# Supplementary material for: MarVis-Pathway: integrative and exploratory pathway analysis of non-targeted metabolomics data
Source: PubMed Central journal article supplement (PMC4419191; doi:10.1007/s11306-014-0734-y), 2014-10-10

## Jasmonic acid (JA)

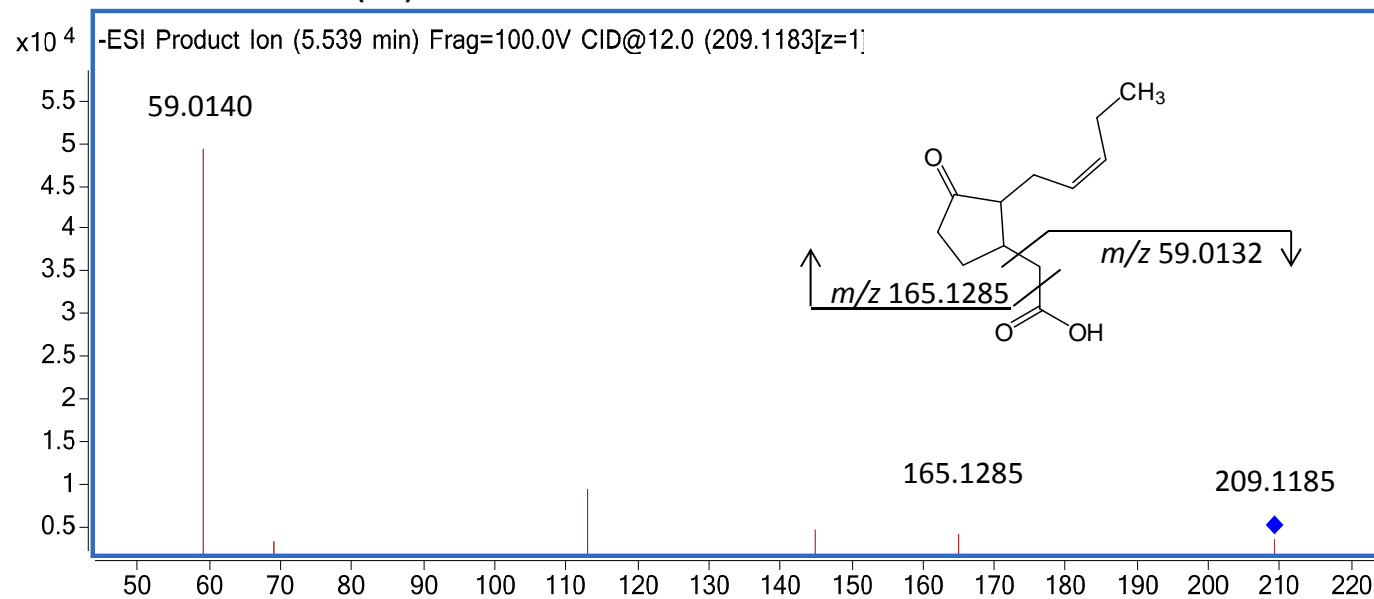

## Jasmonoyl isoleucine (JA-Ile)

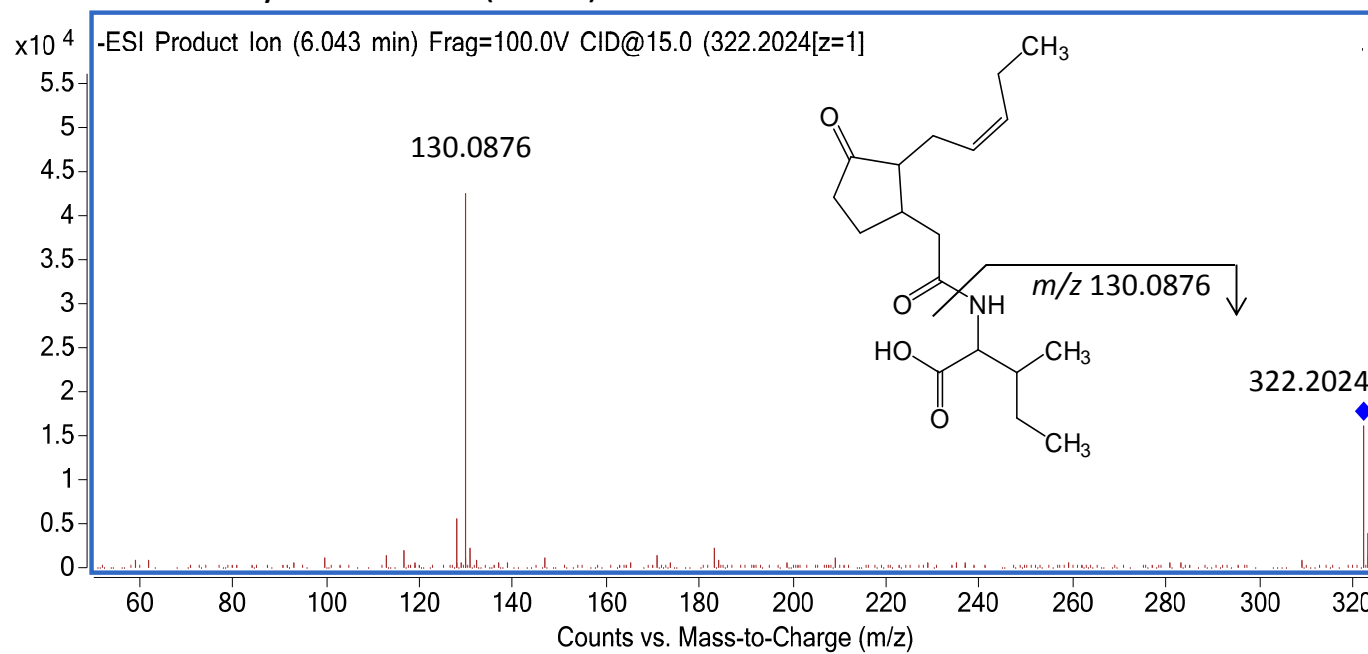

## 12-Carboxyjasmonoyl-L-isoleucine (12-Carboxy-JA-Ile)

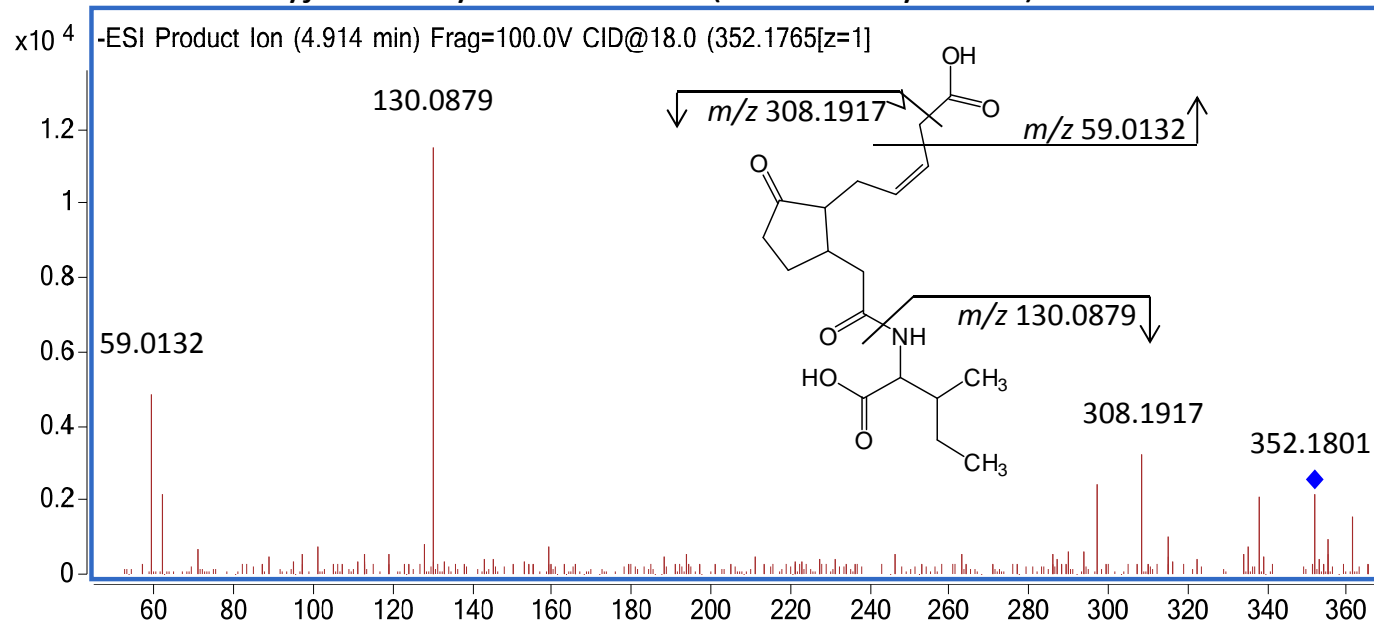

## 12-Hydroxy jasmonoyl isoleucine (12-Hydroxy-JA-Ile)

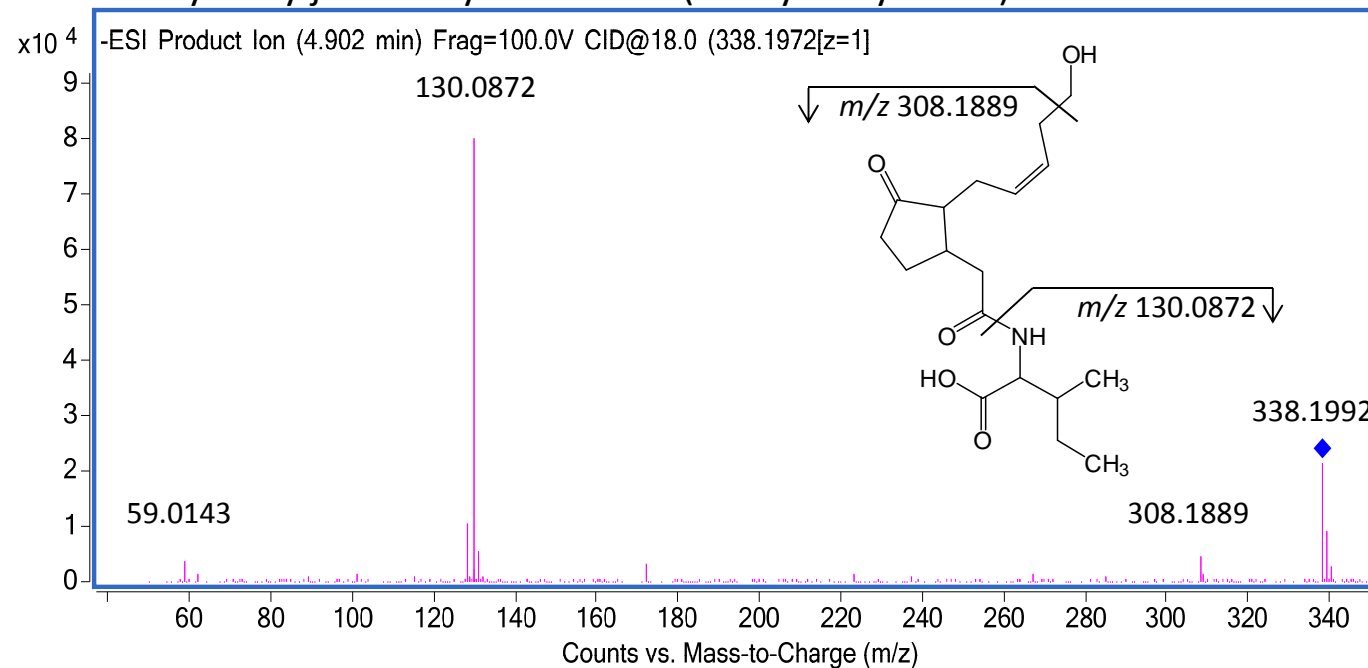

# 12-Hydroxy jasmonic acid (12-Hydroxy-JA)

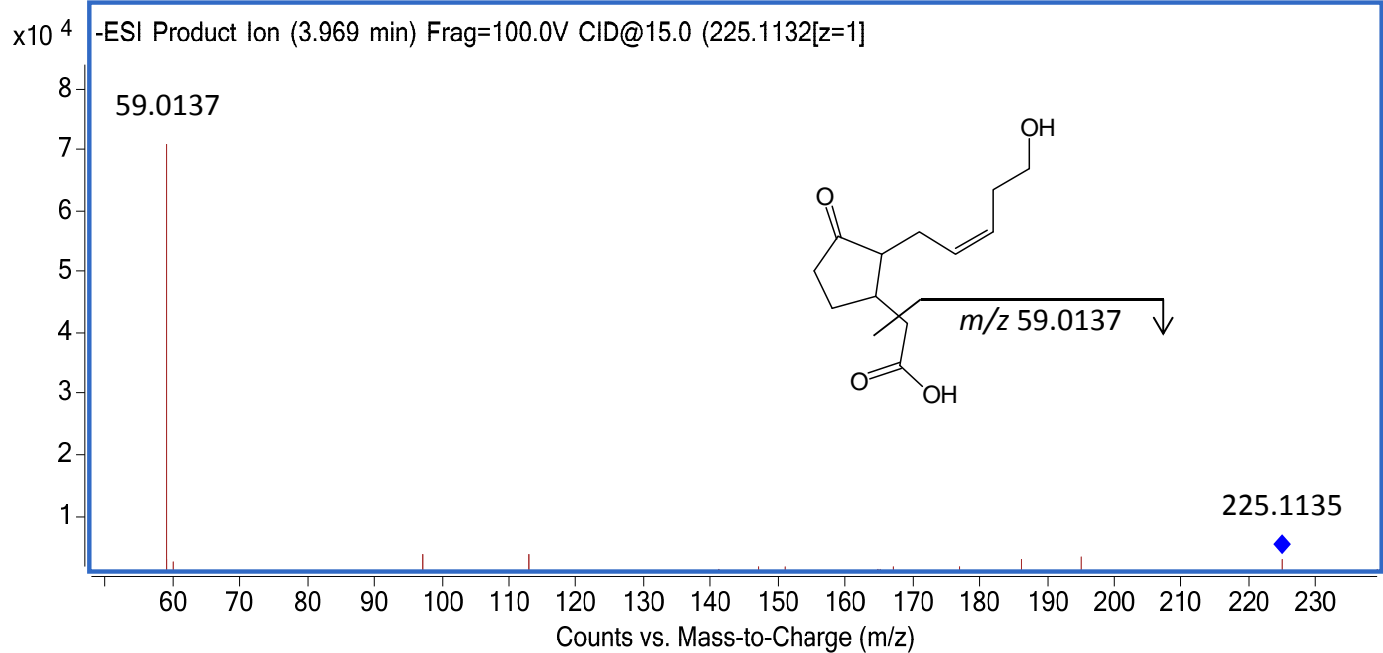

Supplement: 11306_2014_734_MOESM4_ESM.pdf [file 11306_2014_734_MOESM4_ESM.pdf]
